# Supplementary material for: A consistent map in the medial entorhinal cortex supports spatial memory
Source: PubMed Central journal article supplement (PMC10874432; doi:10.1038/s41467-024-45853-4), 2024-02-17
Supplement: 41467_2024_45853_MOESM3_ESM.pdf [file 41467_2024_45853_MOESM3_ESM.pdf]

## **Description of Additional Supplementary Files**

File Name: Supplementary Data 1

Description: Contains exact n and p values, as well as detailed statistical information, for all Figures and Supplementary Figures.
